# Supplementary material for: Adsorption and Electropolymerization of p-Aminophenol Reduces Reproducibility of Electrochemical Immunoassays
Source: MDPI journal article supplement (doi:10.3390/molecules27186046), 2022-09-16
Supplement: s1 [file s1]

## Supplementary Materials

### Adsorption and Electropolymerization of *p*-Aminophenol Reduces Reproducibility of Electrochemical Immunoassays

Grace Buckley <sup>1,†</sup>, Olivia E. Owens <sup>1,†</sup>, Ainslee Gabriel <sup>2</sup>, Claudia Downing <sup>2</sup>, Margaret C. Calhoun <sup>1</sup>, David E. Cliffel <sup>1\*</sup>

<sup>1.</sup> Department of Chemistry, Vanderbilt University, 7330 Stevenson Center, VU Station B 351822, Nashville, Tennessee 37235-1822, United States; grace.e.buckey@vanderbilt.edu (G.B); olivia.eldridge@vanderbilt.edu (O.E.O)

<sup>2.</sup> United States Naval Academy, 121 Blake Rd, Annapolis, MD 21402, United States

\* Correspondence: d.cliffel@vanderbilt.edu (D.E.C)

† These authors contributed equally to this work. Order of authors was decided alphabetically.

#### Cyclic Voltammogram Switching Potential for PAPP

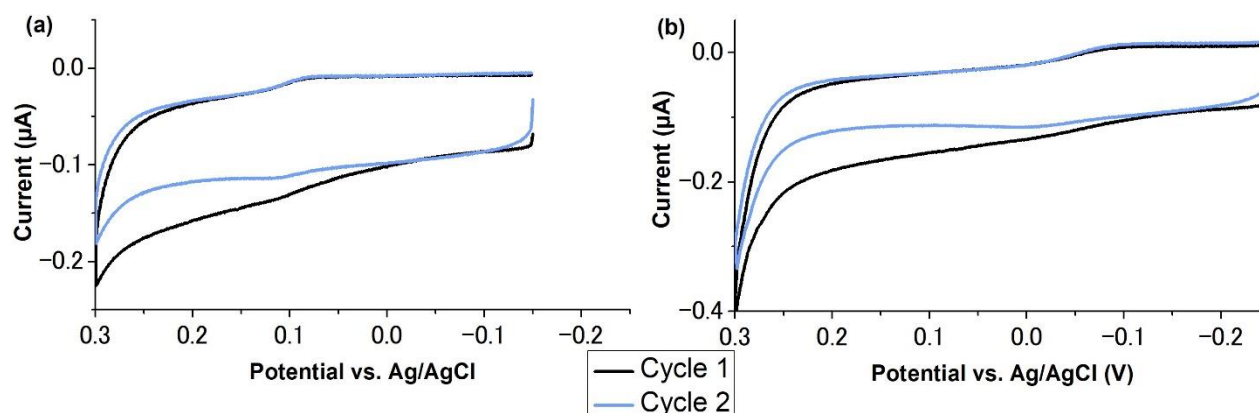

**Figure S1.** Cyclic voltammograms of 5mM PAPP in Tris buffer with a potential window limited to 0.3 V at a) pH 7 and b) pH 9. These results show the importance of determining the appropriate switching potential to minimize electrochemical production of PAP from repetitive scanning.

#### PM-IRRAS Analysis of PAP Polymer, Adsorbed PAP, and Bare Gold Wafer

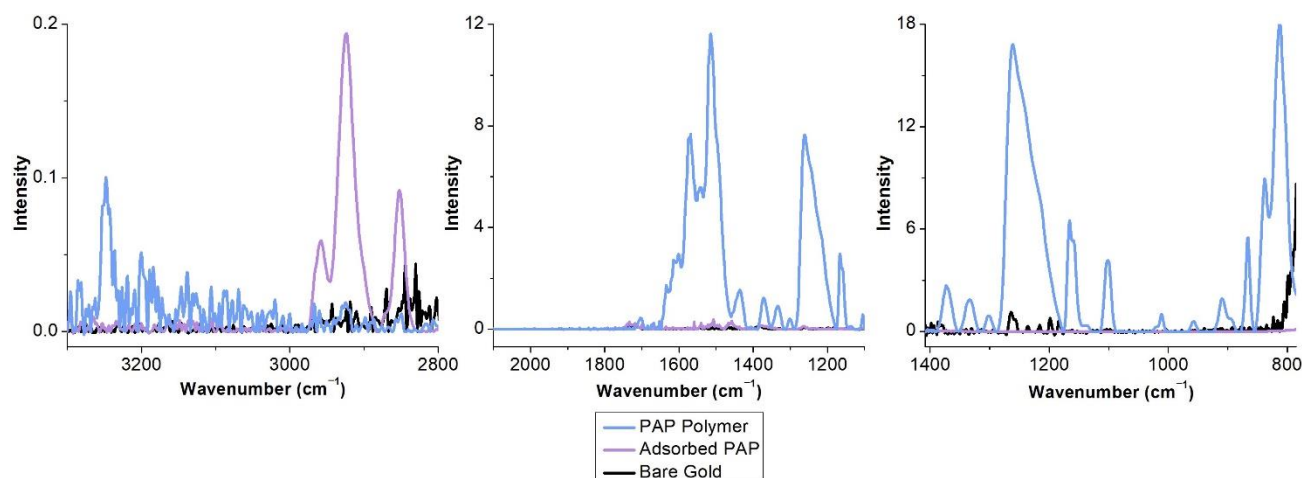

**Figure S2.** PM-IRRAS spectra with absolute intensities of PAP polymerized on a gold wafer (blue), adsorbed PAP on a gold wafer (purple), and a bare gold wafer (black). The spectra are overlaid to emphasize the increased intensity of the polymer compared to adsorbed PAP.

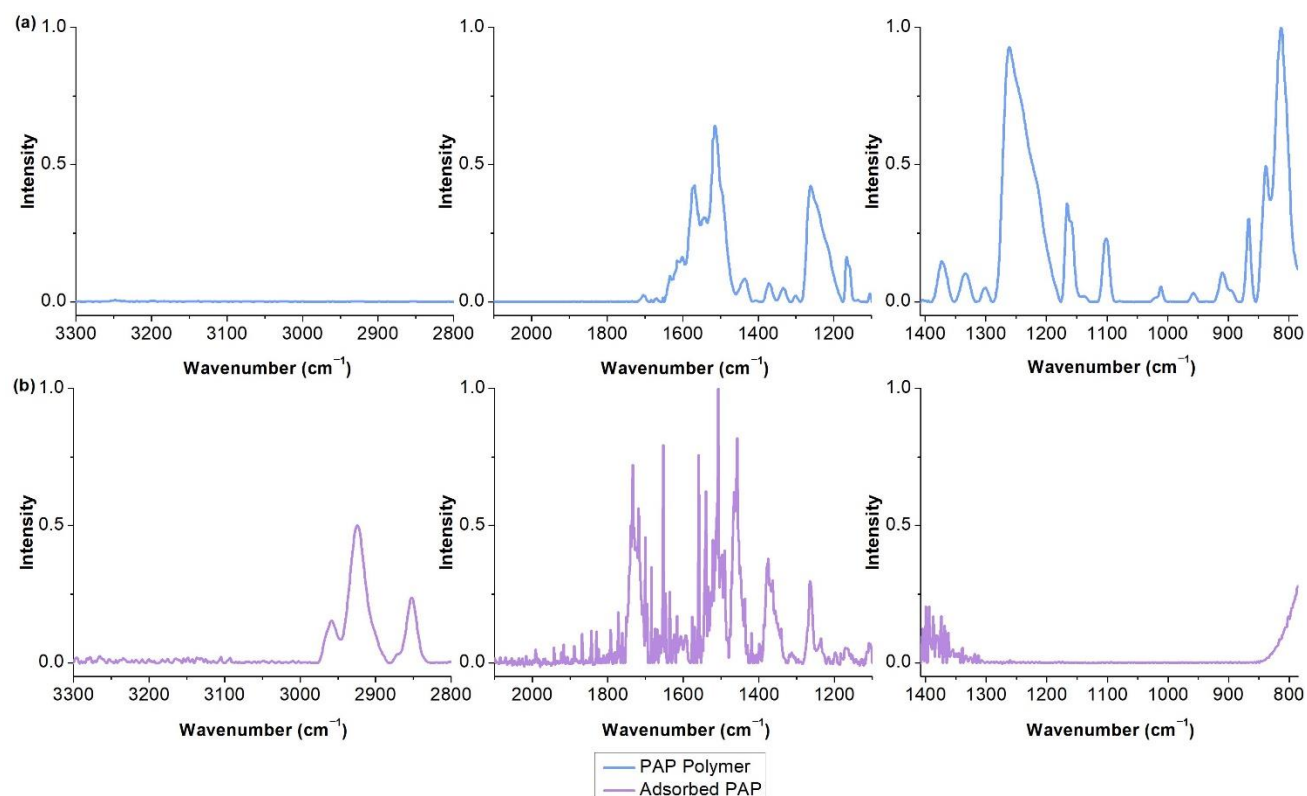

**Figure S3.** PM-IRRAS spectra of a) PAP polymer and b) adsorbed PAP, both normalized to an intensity of one by dividing by the raw value of the most intense peak

**Table S1.** Absorption bands (cm<sup>-1</sup>) of adsorbed PAP and PAP polymerized by chronoamperometry compared to previously reported PAP monomer and polymer.

| Vibration/Functional Group                  | Adsorbed PAP     | Previously Reported in |
|---------------------------------------------|------------------|------------------------|
| C=C Stretch                                 | 2923             | [9]                    |
| C-H Stretch                                 | 2852, 2958       | [9]                    |
| Vibration/Functional Group                  | PAP Polymer      | Previously Reported in |
| Phenyl Ring Stretch                         | 1538, 1543, 1370 | [13]                   |
| C=C Stretch                                 | 1600, 1615       | [8]                    |
| Phenyl Ring Stretch                         | 1600, 1615       | [13]                   |
| C=C Phenyl Ring Stretch                     | 1514             | [7], [8], [13]         |
| C=C Vibration                               | 1612             | [8], [9]               |
| Substituted imine                           | 1612, 1634       | [9]                    |
| O-H deformation or C-O stretching of phenol | 1261             | [7], [8]               |
| Imine and ether linkages                    | 1159, 1100, 1261 | [9]                    |
| C-H in plane deformation                    | 1011, 1165       | [13]                   |

**Raman Analysis Polymerized PAP and Bare Gold Wafer****Table S2.** Absorption bands ( $\text{cm}^{-1}$ ) of PAP polymerized by chronoamperometry compared to previously reported PAP species.

| <b>Vibration/Functional Group</b> | <b>PAP Polymer</b> | <b>Consistent with</b> | <b>Reported in</b> |
|-----------------------------------|--------------------|------------------------|--------------------|
| C-C Ring Stretch                  | 1232, 1613         | PAP                    | [20]               |
| CH Bend                           | 1174               | PAP Cation             | [21]               |
| CC Stretch                        | 1358, 1453         | PAP Cation             | [21]               |
| OH Bend                           | 1531               | PAP Cation             | [21]               |
| Aromatic Ring Stretch             | 1575               | Unique to polymer      | This work          |
| Polymer Linkage                   | 421                | Unique to polymer      | This work          |
| Polymer Linkage                   | 498                | Unique to polymer      | This work          |
| Polymer Linkage                   | 575                | Unique to polymer      | This work          |
| Polymer Linkage                   | 604                | Unique to polymer      | This work          |
